# Supplementary material for: Identification of Diaryl-Quinoline Compounds as Entry Inhibitors of Ebola Virus
Source: Viruses. 2018 Nov 30;10(12):678. doi: 10.3390/v10120678 (PMC6315506; doi:10.3390/v10120678)
Supplement: Supplementary file 1 [file viruses-10-00678-s001.pdf]

| Number  | Structure                                                                           | Inhibition |          |          | Cell Viability |
|---------|-------------------------------------------------------------------------------------|------------|----------|----------|----------------|
|         |                                                                                     | HIV/H5N1   | HIV/LASV | HIV/EBOV |                |
| SYL1619 | 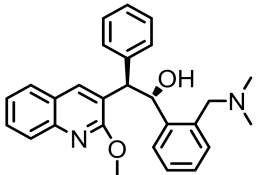   | 89.75%     | 88.30%   | 97.61%   | 58.03%         |
| SYL1620 | 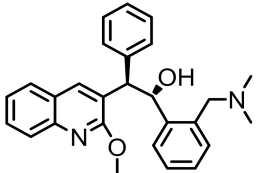   | 97.47%     | 80.55%   | 99.67%   | 36.50%         |
| SYL1621 | 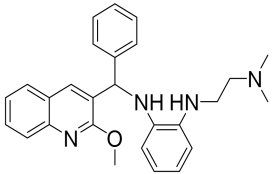   | 97.96%     | 99.14%   | 99.90%   | 52.36%         |
| SYL1622 | 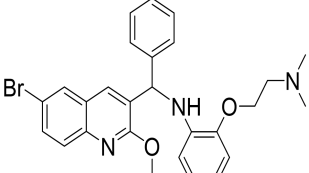  | 96.99%     | 83.38%   | 99.12%   | 77.49%         |
| SYL1623 | 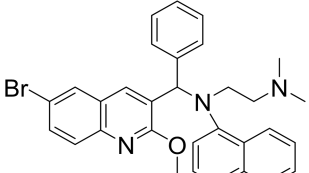 | 105.28%    | 15.39%   | 97.68%   | 87.19%         |
| SYL1624 | 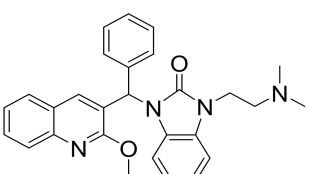 | 53.54%     | 85.88%   | 99.82%   | 86.63%         |
| SYL1625 | 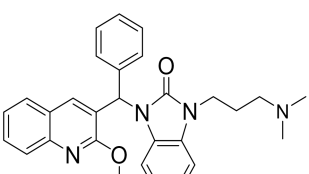 | -0.36%     | 87.77%   | 99.90%   | 86.95%         |
| SYL1626 | 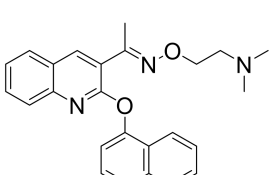 | 44.19%     | 85.39%   | 99.66%   | 86.91%         |

|         |                                                                                     |        |        |        |        |
|---------|-------------------------------------------------------------------------------------|--------|--------|--------|--------|
| SYL1627 | 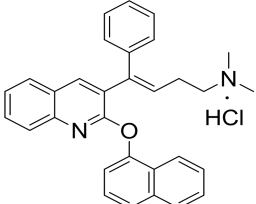   | 49.35% | 87.33% | 99.84% | 89.09% |
| SYL1628 | 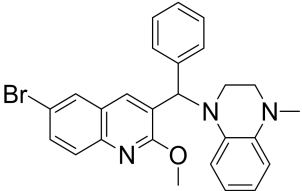   | -5.51% | 86.50% | 99.91% | 86.44% |
| SYL1629 | 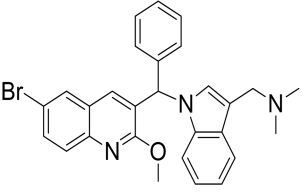   | 29.75% | 88.22% | 99.91% | 90.62% |
| SYL1630 | 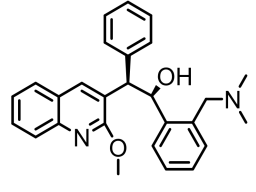  | 70.34% | 91.52% | 99.94% | 81.98% |
| SYL1631 | 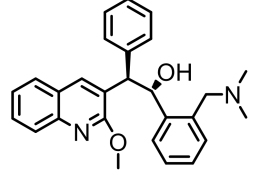 | 93.68% | 92.78% | 99.87% | 84.50% |
| SYL1632 | 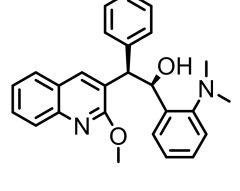 | 91.83% | 90.81% | 99.85% | 84.20% |
| SYL1633 | 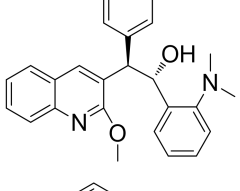 | 65.18% | 84.07% | 99.85% | 86.77% |
| SYL1634 | 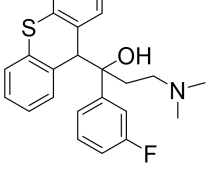 | 83.95% | 83.87% | 99.53% | 81.21% |

|         |                                                                                     |         |         |        |        |
|---------|-------------------------------------------------------------------------------------|---------|---------|--------|--------|
| SYL1635 | 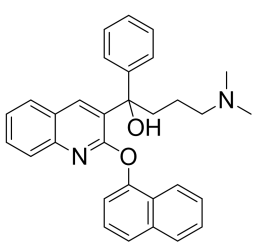   | 97.52%  | 99.31%  | 99.63% | 11.15% |
| SYL1636 | 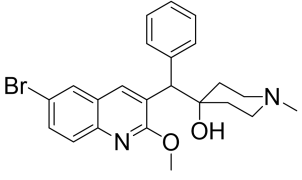   | 97.70%  | 98.04%  | 99.39% | 4.08%  |
| SYL1637 | 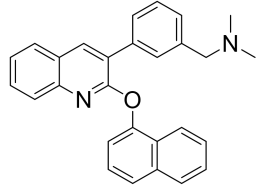   | 97.92%  | 81.65%  | 99.81% | 80.11% |
| SYL1638 | 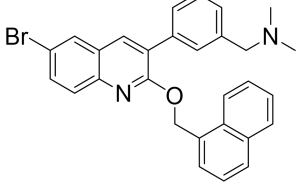  | 98.27%  | 99.18%  | 99.91% | 18.62% |
| SYL1639 | 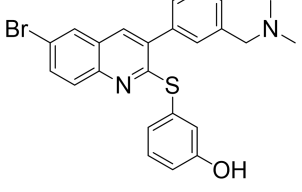 | 97.65%  | 98.93%  | 99.85% | 2.71%  |
| SYL1640 | 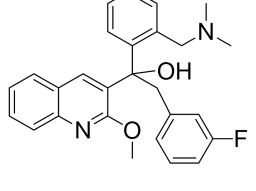 | -1.97%  | -15.08% | 79.06% | 97.64% |
| SYL1641 | 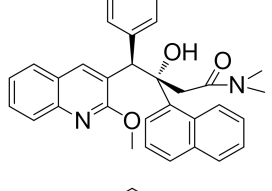 | -18.60% | 24.99%  | 64.41% | 71.39% |
| SYL1642 | 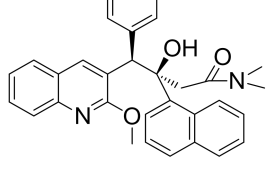 | 14.11%  | 34.99%  | 92.15% | 72.30% |

|         |  |         |        |        |        |
|---------|--|---------|--------|--------|--------|
| SYL1643 |  | 72.74%  | 83.87% | 99.82% | 85.39% |
| SYL1644 |  | 97.63%  | 92.36% | 99.92% | 78.35% |
| SYL1645 |  | 45.37%  | 86.68% | 99.92% | 82.47% |
| SYL1646 |  | -23.29% | 82.50% | 99.92% | 83.55% |
| SYL1647 |  | 44.09%  | 89.08% | 99.94% | 82.66% |
| SYL1648 |  | 37.82%  | 89.27% | 99.91% | 84.21% |
| SYL1649 |  | 79.45%  | 90.46% | 99.90% | 81.62% |
| SYL1650 |  | -15.72% | 87.63% | 99.92% | 81.60% |

|         |                                                                                     |         |        |        |        |
|---------|-------------------------------------------------------------------------------------|---------|--------|--------|--------|
| SYL1651 | 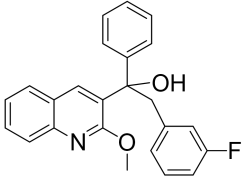   | 30.01%  | 89.23% | 99.95% | 79.56% |
| SYL1652 | 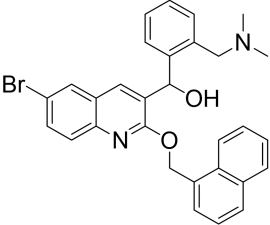   | 98.16%  | 97.16% | 99.94% | 61.30% |
| SYL1653 | 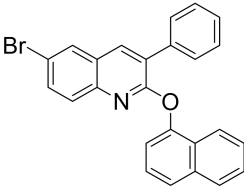   | 64.36%  | 87.04% | 99.85% | 82.57% |
| SYL1654 | 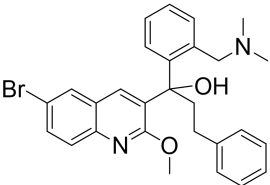  | 8.04%   | 18.79% | 84.84% | 94.74% |
| SYL1655 | 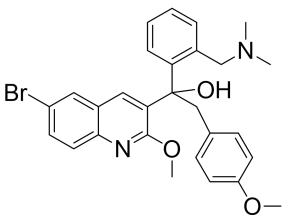 | -17.17% | 28.87% | 90.29% | 95.31% |
| SYL1656 | 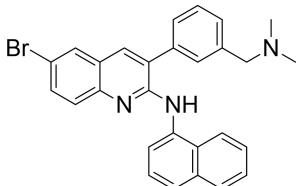 | 49.96%  | 51.43% | 79.70% | 77.79% |
| SYL1657 | 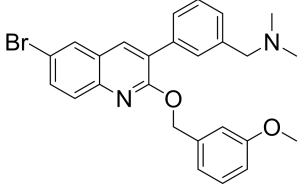 | 0.16%   | 25.76% | 89.23% | 93.92% |
| SYL1658 | 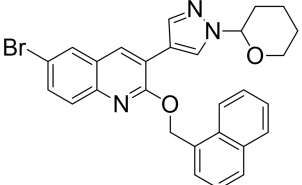 | 36.88%  | 19.23% | 77.41% | 72.67% |

|         |                                                                                     |        |         |        |         |
|---------|-------------------------------------------------------------------------------------|--------|---------|--------|---------|
| SYL1659 | 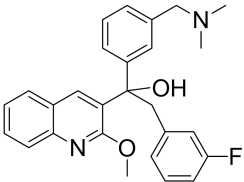   | 96.52% | 97.39%  | 99.09% | 36.09%  |
| SYL1660 | 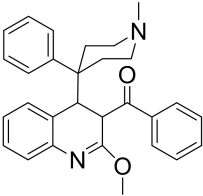   | 3.34%  | -26.55% | 97.48% | 106.02% |
| SYL1661 | 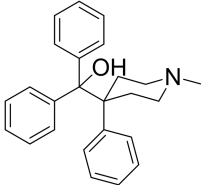   | 5.09%  | 72.11%  | 99.91% | 77.89%  |
| SYL1662 | 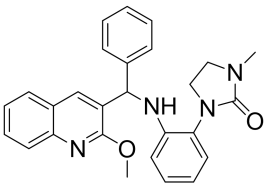  | 68.52% | 89.05%  | 99.56% | 89.06%  |
| SYL1663 | 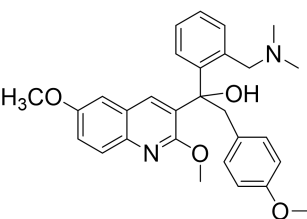 | 88.29% | 89.19%  | 99.90% | 89.15%  |
| SYL1664 | 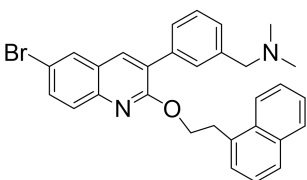 | 50.44% | 86.44%  | 99.90% | 84.59%  |
| SYL1665 | 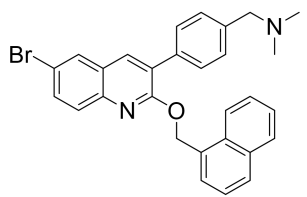 | 84.24% | 88.72%  | 99.92% | 82.87%  |
| SYL1666 | 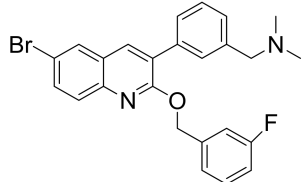 | 87.06% | 91.03%  | 99.92% | 81.28%  |

|         |                                                                                     |        |        |        |        |
|---------|-------------------------------------------------------------------------------------|--------|--------|--------|--------|
| SYL1667 | 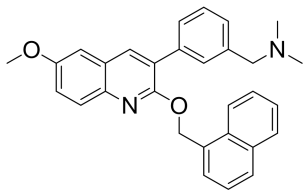   | 85.49% | 85.91% | 99.94% | 83.17% |
| SYL1668 | 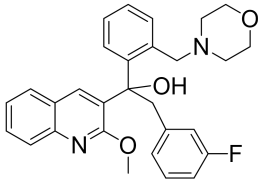   | 74.86% | 86.46% | 99.87% | 79.06% |
| SYL1669 | 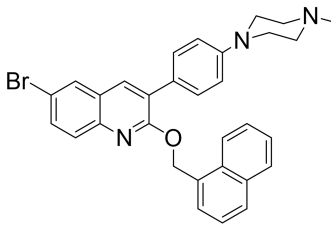   | 96.42% | 92.49% | 99.94% | 82.47% |
| SYL1670 | 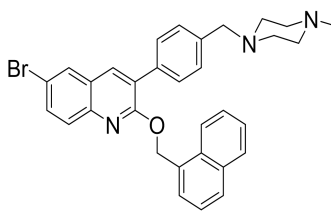  | 91.10% | 77.77% | 99.92% | 82.37% |
| SYL1671 | 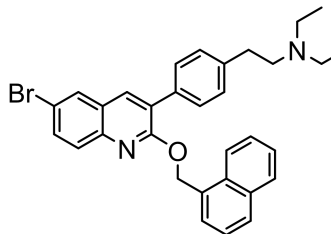 | 92.36% | 89.90% | 99.87% | 88.97% |
| SYL1672 | 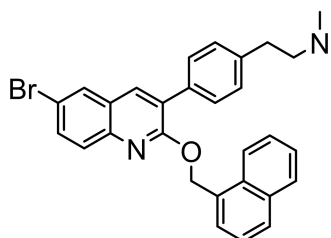 | 98.01% | 99.22% | 99.85% | 2.06%  |

|         |                                                                                     |        |        |        |         |
|---------|-------------------------------------------------------------------------------------|--------|--------|--------|---------|
| SYL1673 | 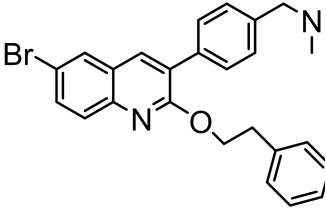   | 97.21% | 94.93% | 99.57% | 88.82%  |
| SYL1675 | 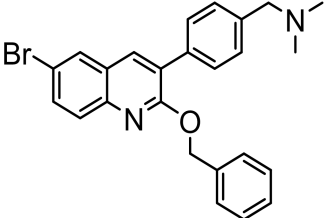   | 98.13% | 91.37% | 99.89% | 88.37%  |
| SYL1676 | 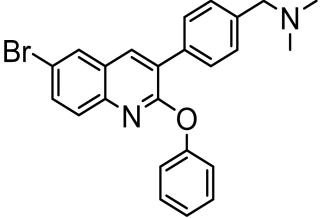  | 36.23% | 19.98% | 71.19% | 89.65%  |
| SYL1677 | 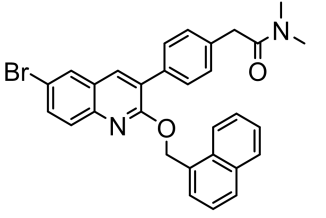 | 15.95% | 29.51% | 90.04% | 58.71%  |
| SYL1678 | 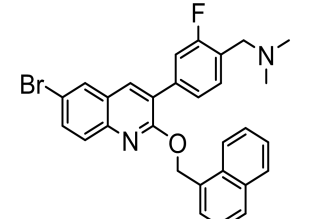 | 93.90% | 97.25% | 99.38% | 122.25% |
| SYL1679 | 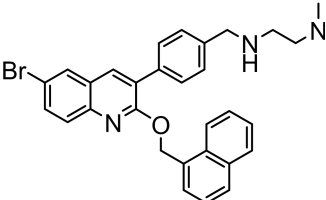 | 96.95% | 97.63% | 99.70% | 117.07% |

|         |                                                                                     |        |        |        |         |
|---------|-------------------------------------------------------------------------------------|--------|--------|--------|---------|
| SYL1682 | 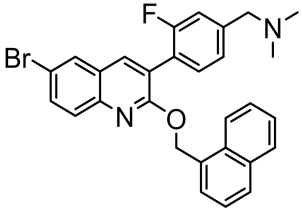   | 78.74% | 94.69% | 99.91% | 84.09%  |
| SYL1683 | 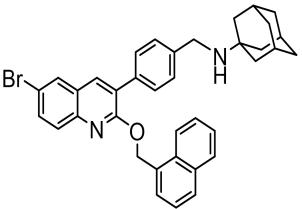   | 21.73% | 26.27% | 95.73% | 104.43% |
| SYL1685 | 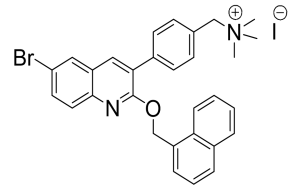   | 65.25% | 93.29% | 99.90% | 103.42% |
| SYL1686 | 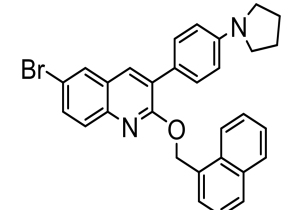  | 65.78% | 90.35% | 99.92% | 82.03%  |
| SYL1687 | 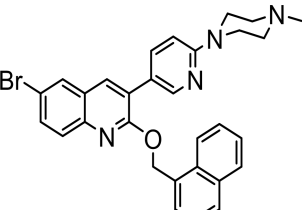 | 31.90% | 88.94% | 99.94% | 78.11%  |
| SYL1688 | 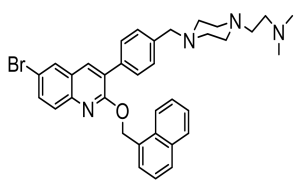 | 91.36% | 88.12% | 99.92% | 80.00%  |
| SYL1689 | 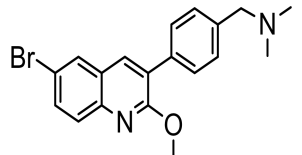 | 97.51% | 88.23% | 99.94% | 78.79%  |

Exact Mass:

|         |                                                                                     |        |        |        |         |
|---------|-------------------------------------------------------------------------------------|--------|--------|--------|---------|
| SYL1690 | 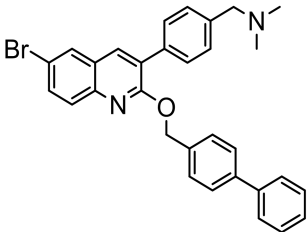   | 98.15% | 86.95% | 99.85% | 80.30%  |
| SYL1691 | 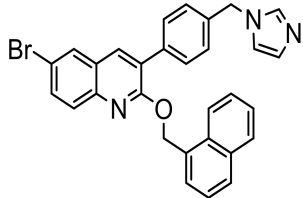   | 97.25% | 57.43% | 92.17% | 72.14%  |
| SYL1692 | 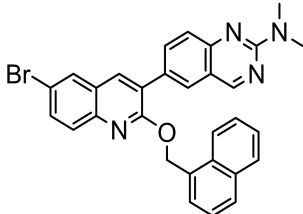   | -2.23% | 11.86% | 48.65% | 87.98%  |
| SYL1693 | 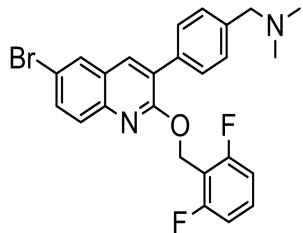  | 97.66% | 99.04% | 99.59% | 3.19%   |
| SYL1696 | 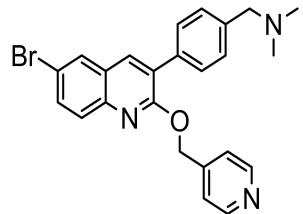 | 97.45% | 98.53% | 99.25% | 26.82%  |
| SYL1697 | 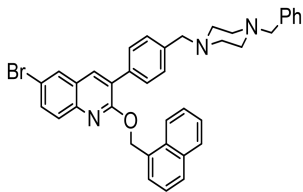 | -5.87% | 15.89% | 67.57% | 90.86%  |
| SYL1698 | 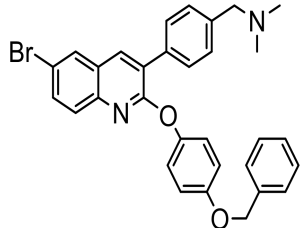 | 97.44% | 98.80% | 99.64% | 107.16% |

|         |                                                                                     |        |        |        |         |
|---------|-------------------------------------------------------------------------------------|--------|--------|--------|---------|
| SYL1699 | 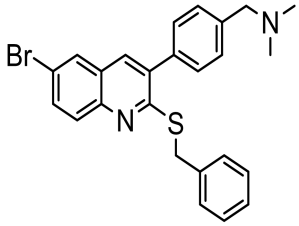   | 94.56% | 93.73% | 99.94% | 105.32% |
| SYL1701 | 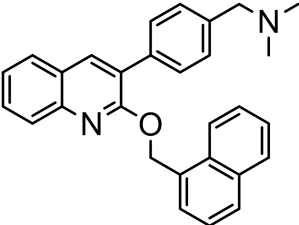   | 98.51% | 97.96% | 99.94% | 88.01%  |
| SYL1702 | 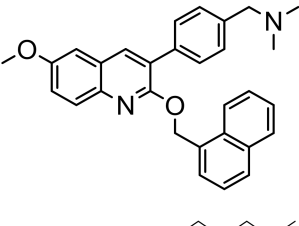   | 87.31% | 89.93% | 99.95% | 89.90%  |
| SYL1705 | 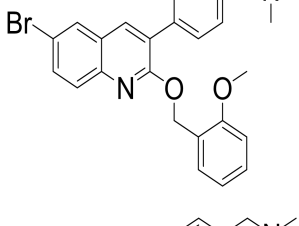  | 59.98% | 88.92% | 99.76% | 86.34%  |
| SYL1706 | 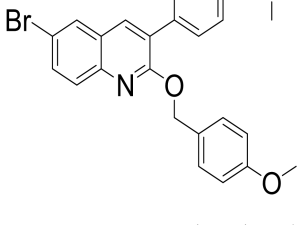 | 54.58% | 87.40% | 99.20% | 82.99%  |
| SYL1707 | 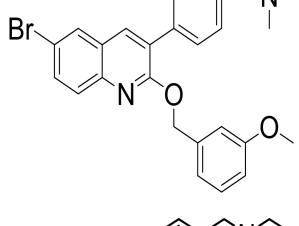 | 95.43% | 78.74% | 99.14% | 80.79%  |
| SYL1708 | 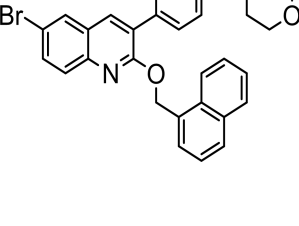 | 18.60% | 82.96% | 98.58% | 80.29%  |

|         |                                                                                     |        |        |        |        |
|---------|-------------------------------------------------------------------------------------|--------|--------|--------|--------|
| SYL1709 | 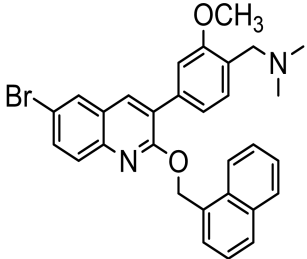   | 94.56% | 81.68% | 99.76% | 74.44% |
| SYL1710 | 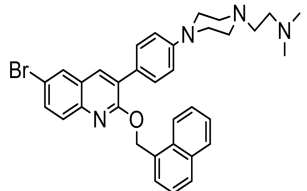   | 97.63% | 98.64% | 99.39% | 1.97%  |
| SYL1711 | 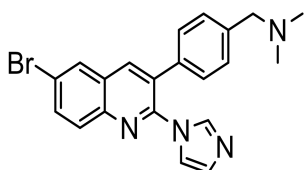   | 38.33% | 25.47% | 98.65% | 90.69% |
| SYL1712 | 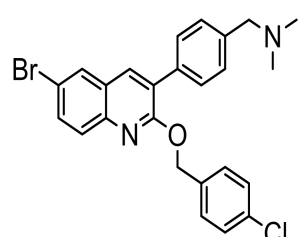  | 5.75%  | 55.35% | 99.39% | 96.93% |
| SYL1713 | 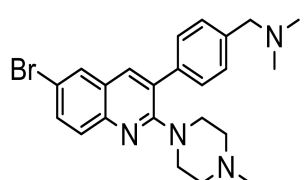 | 97.68% | 99.40% | 99.58% | 1.24%  |
| SYL1714 | 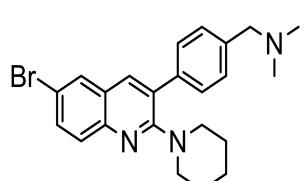 | 83.36% | 51.47% | 98.67% | 91.09% |
| SYL1715 | 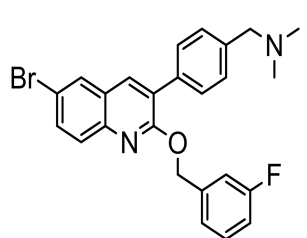 | 95.43% | 76.84% | 99.61% | 84.72% |

|         |                                                                                   |        |        |        |        |
|---------|-----------------------------------------------------------------------------------|--------|--------|--------|--------|
| SYL1716 | 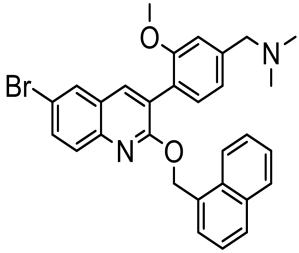 | 98.20% | 99.34% | 99.70% | 1.73%  |
| SYL1721 | 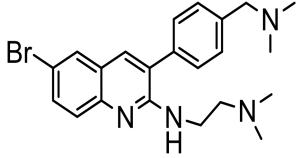 | 98.20% | 99.50% | 99.63% | 1.26%  |
| SYL1723 | 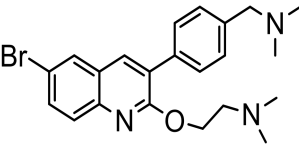 | 98.10% | 97.12% | 99.81% | 68.89% |

---
